# Supplementary material for: When Will Workers Follow an Algorithm? A Field Experiment with a Retail Business
Source: Atypon-hosted journal article supplement (doi:10.1287/mnsc.2020.3599), 2020-06-19
Supplement: mnsc.2020.3599.sm1.pdf [file mnsc.2020.3599.sm1.pdf]

## C Online Appendix

Figure A1: Weekly Trend in the Share of Hot Product Slots Per Machine

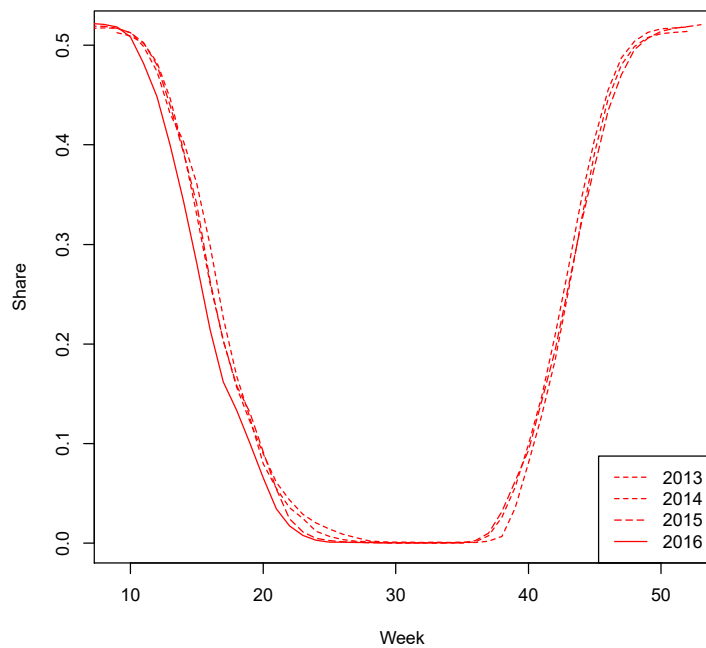

<sup>1</sup> A point is the average share of hot product slots per machine. The data cover the period between 2013 Summer/Spring and 2016 Summer/Spring.

Figure A2: Mean TS and Actual Success Rates Over Time

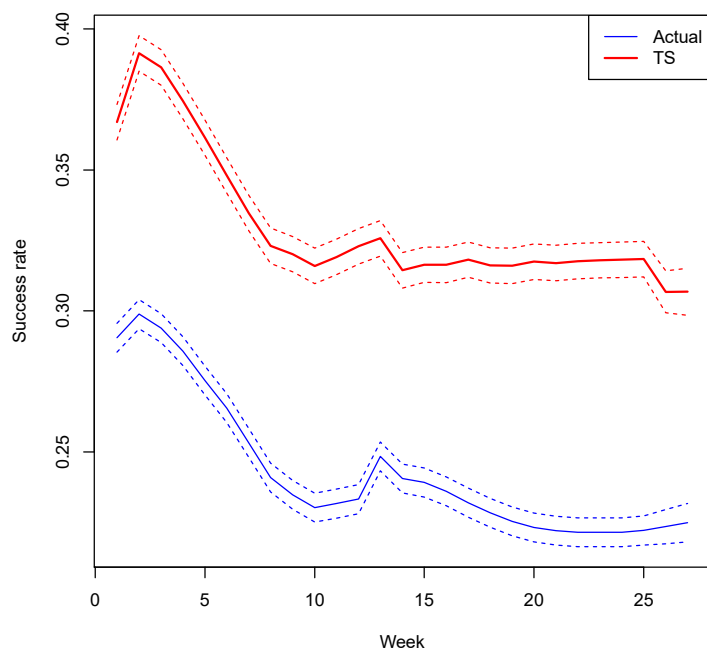

<sup>1</sup> The dashed lines indicate 99% confidence intervals of the mean success rates.

Table A1: Summary Statistics of Product Assortments Per Machine

|                       | <i>N</i> | <i>Mean</i> | <i>Sd</i> | <i>Min</i> | <i>Max</i> | <i>Q1</i> | <i>Q2</i> | <i>Q3</i> |
|-----------------------|----------|-------------|-----------|------------|------------|-----------|-----------|-----------|
| Num. slots            | 869664   | 35.369      | 4.045     | 5          | 42.000     | 34.000    | 36.000    | 36.000    |
| Num. products         | 869664   | 32.298      | 4.410     | 1          | 42.000     | 30.000    | 33.000    | 35.000    |
| Num. categories       | 869664   | 11.073      | 0.917     | 1          | 12.000     | 11.000    | 11.000    | 12.000    |
| Num. hot product      | 869664   | 8.335       | 8.389     | 0          | 32.000     | 0.000     | 6.000     | 18.000    |
| Share hot product     | 869664   | 0.237       | 0.239     | 0          | 1.000      | 0.000     | 0.167     | 0.500     |
| Num. new product      | 869664   | 7.393       | 4.489     | 0          | 24.000     | 4.000     | 8.000     | 11.000    |
| Share new product     | 869664   | 0.209       | 0.125     | 0          | 0.676      | 0.111     | 0.222     | 0.306     |
| Num. private product  | 869664   | 0.238       | 0.689     | 0          | 9.000      | 0.000     | 0.000     | 0.000     |
| Share private product | 869664   | 0.007       | 0.020     | 0          | 0.250      | 0.000     | 0.000     | 0.000     |
| Num. delegated        | 869664   | 17.689      | 6.996     | 0          | 42.000     | 13.000    | 17.000    | 22.000    |
| Share delegated       | 869664   | 0.498       | 0.187     | 0          | 1.000      | 0.361     | 0.467     | 0.611     |

The unit of observation is vending machine and week. The data cover the period between 2013 Summer/Spring and 2016 Summer/Spring.

Table A2: Summary Statistics of Product Sales Per Machine

|                       | <i>N</i> | <i>Mean</i> | <i>Sd</i> | <i>Min</i> | <i>Max</i> | <i>Q1</i> | <i>Q2</i> | <i>Q3</i> |
|-----------------------|----------|-------------|-----------|------------|------------|-----------|-----------|-----------|
| Num. hot product      | 869664   | 147.519     | 217.017   | 0          | 4247.0     | 0.000     | 55.000    | 225.000   |
| Share hot product     | 869664   | 0.273       | 0.290     | 0          | 1.0        | 0.000     | 0.165     | 0.563     |
| Num. new product      | 869664   | 127.757     | 140.532   | 0          | 3341.0     | 32.000    | 85.000    | 176.000   |
| Share new product     | 869664   | 0.202       | 0.132     | 0          | 1.0        | 0.099     | 0.195     | 0.290     |
| Num. private product  | 869664   | 3.979       | 15.315    | 0          | 510.0      | 0.000     | 0.000     | 0.000     |
| Share private product | 869664   | 0.006       | 0.019     | 0          | 0.4        | 0.000     | 0.000     | 0.000     |
| Num. delegated        | 869664   | 288.749     | 275.122   | 0          | 7978.0     | 113.000   | 211.000   | 376.000   |
| Share delegated       | 869664   | 0.467       | 0.199     | 0          | 1.0        | 0.323     | 0.426     | 0.586     |

The unit of observation is vending machine and week. The data cover the period between 2013 Summer/Spring and 2016 Summer/Spring.

Figure A3: Residual Plots of Demand Estimation

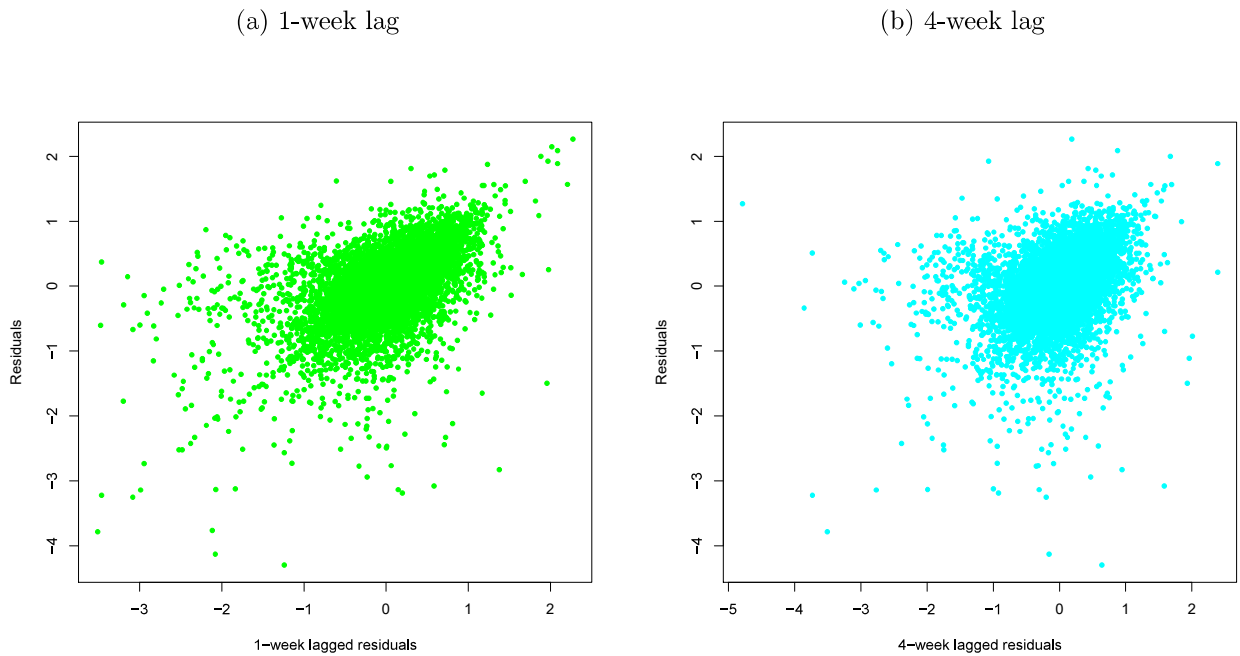

<sup>1</sup> The unit of observation is vending machine, week, and product. The scale is the log difference from the outside share. Because the sample size is huge, I randomly sampled 10,000 observations to display the plot.

Table A3: Summary Statistics of Product Assortments Per Machine By Category

|                        | <i>N</i> | <i>Mean</i> | <i>Sd</i> | <i>Min</i> | <i>Max</i> | <i>Q1</i> | <i>Q2</i> | <i>Q3</i> |
|------------------------|----------|-------------|-----------|------------|------------|-----------|-----------|-----------|
| Num. Green tea         | 869664   | 2.758       | 0.975     | 0          | 26.000     | 2.000     | 3.000     | 3.000     |
| Share Green tea        | 869664   | 0.078       | 0.027     | 0          | 0.743      | 0.056     | 0.083     | 0.088     |
| Num. Other tea         | 869664   | 4.421       | 1.521     | 0          | 17.0       | 3.0       | 4.000     | 5.000     |
| Share Other tea        | 869664   | 0.125       | 0.040     | 0          | 0.5        | 0.1       | 0.119     | 0.143     |
| Num. Water             | 869664   | 3.246       | 1.146     | 0          | 36         | 2.000     | 3.000     | 4.000     |
| Share Water            | 869664   | 0.092       | 0.032     | 0          | 1          | 0.067     | 0.086     | 0.111     |
| Num. Tonic water       | 869664   | 2.494       | 1.344     | 0          | 12.0       | 1.000     | 2.000     | 3.000     |
| Share Tonic water      | 869664   | 0.070       | 0.037     | 0          | 0.4        | 0.048     | 0.067     | 0.095     |
| Num. Canned coffee     | 869664   | 5.776       | 2.031     | 0          | 36         | 4.000     | 6.000     | 7.000     |
| Share Canned coffee    | 869664   | 0.164       | 0.056     | 0          | 1          | 0.133     | 0.167     | 0.194     |
| Num. Bottled coffee    | 869664   | 1.803       | 1.06      | 0          | 10.000     | 1.000     | 2.000     | 2.000     |
| Share Bottled coffee   | 869664   | 0.051       | 0.03      | 0          | 0.278      | 0.028     | 0.048     | 0.067     |
| Num. English tea       | 869664   | 2.058       | 1.213     | 0          | 10.0       | 1.000     | 2.000     | 3.000     |
| Share English tea      | 869664   | 0.058       | 0.034     | 0          | 0.3        | 0.029     | 0.056     | 0.083     |
| Num. Carbonated water  | 869664   | 4.954       | 2.421     | 0          | 36         | 3.000     | 5.000     | 6.000     |
| Share Carbonated water | 869664   | 0.140       | 0.065     | 0          | 1          | 0.095     | 0.139     | 0.167     |
| Num. Fruits            | 869664   | 3.279       | 1.387     | 0          | 18.000     | 2.000     | 3.000     | 4.000     |
| Share Fruits           | 869664   | 0.092       | 0.037     | 0          | 0.429      | 0.067     | 0.088     | 0.111     |
| Num. Healthy drink     | 869664   | 1.702       | 0.786     | 0          | 30         | 1.000     | 2.000     | 2.000     |
| Share Healthy drink    | 869664   | 0.048       | 0.022     | 0          | 1          | 0.029     | 0.056     | 0.056     |
| Num. Specialty         | 869664   | 0.594       | 0.766     | 0          | 6.000      | 0         | 0         | 1.000     |
| Share Specialty        | 869664   | 0.017       | 0.022     | 0          | 0.167      | 0         | 0         | 0.028     |
| Num. Other             | 869664   | 2.283       | 1.563     | 0          | 28         | 1.000     | 2.000     | 3.000     |
| Share Other            | 869664   | 0.065       | 0.044     | 0          | 1          | 0.028     | 0.057     | 0.095     |

The unit of observation is vending machine and week. The data cover the period between 2013 Summer/Spring and 2016 Summer/Spring.

Table A4: Summary Statistics of Product Sales Per Machine By Category

|                        | <i>N</i> | <i>Mean</i> | <i>Sd</i> | <i>Min</i> | <i>Max</i> | <i>Q1</i> | <i>Q2</i> | <i>Q3</i> |
|------------------------|----------|-------------|-----------|------------|------------|-----------|-----------|-----------|
| Num. Green tea         | 869664   | 51.469      | 59.462    | 0          | 2712       | 19.000    | 37.000    | 66.000    |
| Share Green tea        | 869664   | 0.080       | 0.035     | 0          | 1          | 0.057     | 0.075     | 0.097     |
| Num. Other tea         | 869664   | 81.468      | 89.527    | 0          | 3720       | 27.000    | 56.000    | 106.000   |
| Share Other tea        | 869664   | 0.119       | 0.045     | 0          | 1          | 0.089     | 0.117     | 0.147     |
| Num. Water             | 869664   | 74.135      | 79.123    | 0          | 2112       | 23.000    | 50.000    | 97.000    |
| Share Water            | 869664   | 0.108       | 0.047     | 0          | 1          | 0.073     | 0.105     | 0.138     |
| Num. Tonic water       | 869664   | 46.904      | 59.572    | 0          | 1418       | 11.000    | 27.000    | 59.000    |
| Share Tonic water      | 869664   | 0.067       | 0.043     | 0          | 1          | 0.034     | 0.062     | 0.095     |
| Num. Canned coffee     | 869664   | 89.147      | 79.838    | 0          | 2514       | 41.000    | 71.000    | 115.000   |
| Share Canned coffee    | 869664   | 0.158       | 0.073     | 0          | 1          | 0.108     | 0.146     | 0.194     |
| Num. Bottled coffee    | 869664   | 36.485      | 35.778    | 0          | 644        | 13.000    | 27.000    | 49.000    |
| Share Bottled coffee   | 869664   | 0.061       | 0.038     | 0          | 1          | 0.034     | 0.055     | 0.083     |
| Num. English tea       | 869664   | 34.428      | 36.645    | 0          | 617.00     | 10.000    | 23.00     | 46.000    |
| Share English tea      | 869664   | 0.057       | 0.040     | 0          | 0.52       | 0.027     | 0.05      | 0.081     |
| Num. Carbonated water  | 869664   | 87.438      | 92.299    | 0          | 2234       | 29.000    | 59.00     | 113.000   |
| Share Carbonated water | 869664   | 0.136       | 0.075     | 0          | 1          | 0.084     | 0.13      | 0.179     |
| Num. Fruits            | 869664   | 53.700      | 55.838    | 0          | 1053       | 18.000    | 37.000    | 71.000    |
| Share Fruits           | 869664   | 0.081       | 0.038     | 0          | 1          | 0.055     | 0.079     | 0.104     |
| Num. Healthy drink     | 869664   | 28.718      | 30.415    | 0          | 524        | 8.000     | 19.000    | 39.000    |
| Share Healthy drink    | 869664   | 0.045       | 0.029     | 0          | 1          | 0.023     | 0.041     | 0.062     |
| Num. Specialty         | 869664   | 9.203       | 18.877    | 0          | 446.000    | 0         | 0         | 11.000    |
| Share Specialty        | 869664   | 0.014       | 0.022     | 0          | 0.362      | 0         | 0         | 0.023     |
| Num. Other             | 869664   | 41.039      | 45.337    | 0          | 964        | 10.000    | 28.000    | 57.000    |
| Share Other            | 869664   | 0.074       | 0.062     | 0          | 1          | 0.025     | 0.064     | 0.111     |

The unit of observation is vending machine and week. The data cover the period between 2013 Summer/Spring and 2016 Summer/Spring.

Table A5: *Ex Post* Belief About  $\gamma$  and  $\sigma^2$ 

| <i>Parameter</i> | <i>N</i> | <i>Mean</i> | <i>Sd</i> | <i>Min</i> | <i>Max</i> | <i>Q1</i> | <i>Q2</i> | <i>Q3</i> |
|------------------|----------|-------------|-----------|------------|------------|-----------|-----------|-----------|
| $\gamma$         | 1472     | 0.751       | 0.089     | 0.354      | 1.021      | 0.703     | 0.756     | 0.809     |
| $\sigma^2$       | 1472     | 0.271       | 0.119     | 0.086      | 1.010      | 0.185     | 0.234     | 0.325     |

<sup>1</sup> The summary statistics is across areas and seasons, and  $N$  is the number of relevant areas and seasons.

Table A6: *Ex Post* Belief About  $\beta$ 

| <i>Group</i>     | <i>N</i> | <i>Mean</i> | <i>Sd</i> | <i>Min</i> | <i>Max</i> | <i>Q1</i> | <i>Q2</i> | <i>Q3</i> |
|------------------|----------|-------------|-----------|------------|------------|-----------|-----------|-----------|
| <i>Cold</i>      |          |             |           |            |            |           |           |           |
| Green tea        | 1472     | 0.050       | 0.022     | 0.000      | 0.695      | 0.043     | 0.051     | 0.059     |
| Other tea        | 1471     | 0.069       | 0.018     | -0.132     | 0.121      | 0.062     | 0.071     | 0.079     |
| Water            | 1472     | 0.046       | 0.015     | 0.006      | 0.408      | 0.041     | 0.047     | 0.053     |
| Tonic water      | 1472     | 0.063       | 0.019     | 0.005      | 0.411      | 0.054     | 0.065     | 0.074     |
| Canned coffee    | 1470     | 0.079       | 0.034     | -0.010     | 0.201      | 0.051     | 0.073     | 0.107     |
| Bottled coffee   | 1471     | 0.060       | 0.034     | -0.633     | 0.165      | 0.039     | 0.057     | 0.081     |
| English tea      | 1471     | 0.048       | 0.035     | -0.270     | 0.378      | 0.024     | 0.045     | 0.074     |
| Carbonated water | 1472     | 0.050       | 0.014     | 0.001      | 0.250      | 0.046     | 0.052     | 0.058     |
| Fruit            | 1472     | 0.054       | 0.032     | -0.317     | 0.978      | 0.041     | 0.055     | 0.067     |
| Healthy drink    | 1472     | 0.033       | 0.021     | -0.043     | 0.703      | 0.027     | 0.033     | 0.040     |
| Specialty        | 1188     | 0.038       | 0.068     | -0.303     | 1.275      | 0.023     | 0.046     | 0.060     |
| Other            | 1467     | 0.057       | 0.063     | -0.897     | 0.694      | 0.024     | 0.045     | 0.081     |
| <i>Hot</i>       |          |             |           |            |            |           |           |           |
| Green tea        | 1472     | -0.034      | 0.029     | -0.209     | 0.462      | -0.047    | -0.032    | -0.020    |
| Other tea        | 1472     | -0.055      | 0.039     | -0.395     | 0.184      | -0.068    | -0.051    | -0.035    |
| Canned coffee    | 1472     | -0.049      | 0.028     | -0.354     | 0.091      | -0.069    | -0.047    | -0.031    |
| Bottled coffee   | 1471     | -0.043      | 0.038     | -0.403     | 0.260      | -0.056    | -0.038    | -0.022    |
| English tea      | 1472     | -0.053      | 0.036     | -0.336     | 0.143      | -0.075    | -0.049    | -0.032    |
| Fruit            | 1472     | -0.055      | 0.042     | -0.243     | 0.613      | -0.075    | -0.051    | -0.033    |
| Other            | 1472     | -0.049      | 0.045     | -0.260     | 0.611      | -0.078    | -0.043    | -0.019    |

<sup>1</sup> The summary statistics is across areas and seasons, and  $N$  is the number of relevant areas and seasons.

Table A7: *Ex Post* Belief About  $\xi$

| <i>Product</i>         | <i>N</i> | <i>Mean</i> | <i>Sd</i> | <i>Min</i> | <i>Max</i> | <i>Q1</i> | <i>Q2</i> | <i>Q3</i> |
|------------------------|----------|-------------|-----------|------------|------------|-----------|-----------|-----------|
| 100 percentile product | 125      | -3.952      | 0.630     | -5.946     | 0.376      | -4.220    | -3.957    | -3.689    |
| 90 percentile product  | 358      | -4.390      | 0.512     | -6.108     | -2.931     | -4.653    | -4.332    | -4.063    |
| 80 percentile product  | 768      | -4.670      | 0.525     | -6.066     | 0.630      | -4.956    | -4.710    | -4.485    |
| 70 percentile product  | 250      | -5.456      | 0.385     | -7.142     | -4.355     | -5.704    | -5.452    | -5.212    |
| 60 percentile product  | 1141     | -5.663      | 0.381     | -9.561     | -4.323     | -5.894    | -5.652    | -5.410    |
| 50 percentile product  | 351      | -6.015      | 0.440     | -7.683     | -4.955     | -6.259    | -5.963    | -5.734    |
| 40 percentile product  | 154      | -6.281      | 0.505     | -7.916     | -4.927     | -6.613    | -6.308    | -5.905    |
| 30 percentile product  | 259      | -6.407      | 1.109     | -11.968    | -4.272     | -6.730    | -6.208    | -5.801    |
| 20 percentile product  | 1274     | -6.575      | 0.775     | -9.089     | -4.319     | -7.196    | -6.547    | -5.986    |
| 10 percentile product  | 275      | -6.788      | 0.833     | -11.565    | -5.334     | -7.042    | -6.618    | -6.291    |

<sup>1</sup> The summary statistics is across areas and seasons, and *N* is the number of relevant areas and seasons. The percentile is among products that are estimated more than 100 areas and seasons. I cannot provide the product names because of confidentiality reasons.

Table A8: Mean TS and Actual Success Rates Over Time

|                     | <i>TS</i>         | <i>Actual</i>     |
|---------------------|-------------------|-------------------|
| Week 1              | 0.37 [0.36; 0.37] | 0.29 [0.29; 0.30] |
| Week 2              | 0.39 [0.39; 0.40] | 0.30 [0.29; 0.30] |
| Week 3              | 0.39 [0.38; 0.39] | 0.29 [0.29; 0.30] |
| Week 4              | 0.37 [0.37; 0.38] | 0.29 [0.28; 0.29] |
| Week 5              | 0.36 [0.36; 0.37] | 0.28 [0.27; 0.28] |
| Week 6              | 0.35 [0.34; 0.35] | 0.27 [0.26; 0.27] |
| Week 7              | 0.33 [0.33; 0.34] | 0.25 [0.25; 0.26] |
| Week 8              | 0.32 [0.32; 0.33] | 0.24 [0.24; 0.25] |
| Week 9              | 0.32 [0.31; 0.33] | 0.23 [0.23; 0.24] |
| Week 10             | 0.32 [0.31; 0.32] | 0.23 [0.23; 0.24] |
| Week 11             | 0.32 [0.31; 0.33] | 0.23 [0.23; 0.24] |
| Week 12             | 0.32 [0.32; 0.33] | 0.23 [0.23; 0.24] |
| Week 13             | 0.33 [0.32; 0.33] | 0.25 [0.24; 0.25] |
| Week 14             | 0.31 [0.31; 0.32] | 0.24 [0.24; 0.25] |
| Week 15             | 0.32 [0.31; 0.32] | 0.24 [0.23; 0.24] |
| Week 16             | 0.32 [0.31; 0.32] | 0.24 [0.23; 0.24] |
| Week 17             | 0.32 [0.31; 0.32] | 0.23 [0.23; 0.24] |
| Week 18             | 0.32 [0.31; 0.32] | 0.23 [0.22; 0.23] |
| Week 19             | 0.32 [0.31; 0.32] | 0.23 [0.22; 0.23] |
| Week 20             | 0.32 [0.31; 0.32] | 0.22 [0.22; 0.23] |
| Week 21             | 0.32 [0.31; 0.32] | 0.22 [0.22; 0.23] |
| Week 22             | 0.32 [0.31; 0.32] | 0.22 [0.22; 0.23] |
| Week 23             | 0.32 [0.31; 0.32] | 0.22 [0.22; 0.23] |
| Week 24             | 0.32 [0.31; 0.32] | 0.22 [0.22; 0.23] |
| Week 25             | 0.32 [0.31; 0.32] | 0.22 [0.22; 0.23] |
| Week 26             | 0.31 [0.30; 0.31] | 0.22 [0.22; 0.23] |
| Week 27             | 0.31 [0.30; 0.32] | 0.22 [0.22; 0.23] |
| R <sup>2</sup>      | 0.93              | 0.92              |
| Adj. R <sup>2</sup> | 0.93              | 0.92              |
| Num. obs.           | 33850             | 33850             |
| RMSE                | 0.09              | 0.07              |

<sup>1</sup> 99% confidence intervals are reported.

Table A9: Effect of Algorithmic Advice on Assortment Decisions: Area/Worker-level Heterogeneity

|                                                        | (1)                  | (2)                  | (3)                  |
|--------------------------------------------------------|----------------------|----------------------|----------------------|
| Net Num. Targeted                                      | 0.326***<br>(0.006)  | 0.112***<br>(0.005)  | 0.117***<br>(0.005)  |
| Net Num. Targeted $\times$ Regret                      | -0.013<br>(0.012)    | -0.005<br>(0.010)    | -0.006<br>(0.010)    |
| Net Num. Targeted $\times$ Advice                      | -0.006<br>(0.008)    | 0.004<br>(0.006)     | 0.004<br>(0.006)     |
| Net Num. Targeted $\times$ Advice $\times$ Regret      | 0.055***<br>(0.016)  | 0.046***<br>(0.013)  | 0.046***<br>(0.013)  |
| Net Num. Targeted $\times$ Integration                 | 0.013<br>(0.008)     | 0.010*<br>(0.006)    | 0.010<br>(0.006)     |
| Net Num. Targeted $\times$ Integration $\times$ Regret | -0.063***<br>(0.014) | -0.064***<br>(0.011) | -0.064***<br>(0.011) |
| Num. Centralized                                       | 1.092***<br>(0.003)  | 0.836***<br>(0.004)  | 0.841***<br>(0.004)  |
| R <sup>2</sup>                                         | 0.744                | 0.841                | 0.843                |
| Adj. R <sup>2</sup>                                    | 0.744                | 0.841                | 0.842                |
| Num. obs.                                              | 74029                | 74029                | 74029                |
| RMSE                                                   | 5.841                | 4.606                | 4.585                |

<sup>1</sup> \*\*\* $p < 0.01$ , \*\* $p < 0.05$ , \* $p < 0.10$ . Standard errors are in parentheses. Moreover, Model 2 controls for product-specific fixed effects, and Model 3 controls for year-week-specific fixed effects.  $Regret_i$  is the average of actual regret minus TS regret.

Table A10: Effect of Algorithmic Advice on Assortment Decisions: Area/Worker-level Heterogeneity

|                                                                       | (1)                  | (2)                  | (3)                  |
|-----------------------------------------------------------------------|----------------------|----------------------|----------------------|
| Net Num. Targeted                                                     | 0.328***<br>(0.006)  | 0.107***<br>(0.005)  | 0.112***<br>(0.005)  |
| Net Num. Targeted $\times$ Regret                                     | -0.011<br>(0.012)    | -0.008<br>(0.010)    | -0.008<br>(0.010)    |
| Net Num. Targeted $\times$ Area Sales Volatility                      | -0.011*<br>(0.006)   | 0.022***<br>(0.005)  | 0.021***<br>(0.005)  |
| Net Num. Targeted $\times$ Advice                                     | -0.008<br>(0.008)    | 0.008<br>(0.006)     | 0.008<br>(0.006)     |
| Net Num. Targeted $\times$ Advice $\times$ Regret                     | 0.053***<br>(0.016)  | 0.047***<br>(0.013)  | 0.047***<br>(0.013)  |
| Net Num. Targeted $\times$ Advice $\times$ Area Sales Volatility      | 0.012<br>(0.009)     | -0.015**<br>(0.007)  | -0.014**<br>(0.007)  |
| Net Num. Targeted $\times$ Integration                                | 0.007<br>(0.008)     | 0.001<br>(0.006)     | 0.001<br>(0.006)     |
| Net Num. Targeted $\times$ Integration $\times$ Regret                | -0.072***<br>(0.014) | -0.079***<br>(0.011) | -0.079***<br>(0.011) |
| Net Num. Targeted $\times$ Integration $\times$ Area Sales Volatility | 0.027***<br>(0.008)  | 0.043***<br>(0.006)  | 0.043***<br>(0.006)  |
| Num. Centralized                                                      | 1.092***<br>(0.003)  | 0.834***<br>(0.004)  | 0.840***<br>(0.004)  |
| R <sup>2</sup>                                                        | 0.744                | 0.842                | 0.843                |
| Adj. R <sup>2</sup>                                                   | 0.744                | 0.841                | 0.842                |
| Num. obs.                                                             | 74029                | 74029                | 74029                |
| RMSE                                                                  | 5.840                | 4.601                | 4.580                |

<sup>1</sup> \*\*\* $p < 0.01$ , \*\* $p < 0.05$ , \* $p < 0.10$ . Standard errors are given in parentheses. Model 2 controls for product-specific fixed effects, and Model 3 controls for year-week-specific fixed effects.

Table A11: Effect of Algorithmic Advice on Assortment Decisions: Area/Worker-level Heterogeneity

|                                                                       | (1)                  | (2)                  | (3)                  |
|-----------------------------------------------------------------------|----------------------|----------------------|----------------------|
| Net Num. Targeted                                                     | 0.331***<br>(0.010)  | 0.100***<br>(0.008)  | 0.106***<br>(0.008)  |
| Net Num. Targeted $\times$ Regret                                     | -0.010<br>(0.013)    | -0.002<br>(0.010)    | -0.003<br>(0.010)    |
| Net Num. Targeted $\times$ Experience                                 | -0.007<br>(0.013)    | 0.009<br>(0.010)     | 0.008<br>(0.010)     |
| Net Num. Targeted $\times$ Area Sales Volatility                      | -0.011<br>(0.007)    | 0.021***<br>(0.005)  | 0.020***<br>(0.005)  |
| Net Num. Targeted $\times$ Advice                                     | -0.012<br>(0.013)    | 0.008<br>(0.010)     | 0.008<br>(0.010)     |
| Net Num. Targeted $\times$ Advice $\times$ Regret                     | 0.052***<br>(0.017)  | 0.043***<br>(0.013)  | 0.043***<br>(0.013)  |
| Net Num. Targeted $\times$ Advice $\times$ Experience                 | 0.009<br>(0.018)     | -0.000<br>(0.014)    | 0.001<br>(0.014)     |
| Net Num. Targeted $\times$ Advice $\times$ Area Sales Volatility      | 0.013<br>(0.009)     | -0.013*<br>(0.007)   | -0.012*<br>(0.007)   |
| Net Num. Targeted $\times$ Integration                                | 0.004<br>(0.012)     | -0.018*<br>(0.009)   | -0.018*<br>(0.009)   |
| Net Num. Targeted $\times$ Integration $\times$ Regret                | -0.072***<br>(0.014) | -0.073***<br>(0.011) | -0.073***<br>(0.011) |
| Net Num. Targeted $\times$ Integration $\times$ Experience            | 0.004<br>(0.017)     | 0.033**<br>(0.013)   | 0.032**<br>(0.013)   |
| Net Num. Targeted $\times$ Integration $\times$ Area Sales Volatility | 0.027***<br>(0.008)  | 0.045***<br>(0.007)  | 0.045***<br>(0.007)  |
| Num. Centralized                                                      | 1.093***<br>(0.003)  | 0.831***<br>(0.004)  | 0.837***<br>(0.004)  |
| R <sup>2</sup>                                                        | 0.745                | 0.843                | 0.844                |
| Adj. R <sup>2</sup>                                                   | 0.744                | 0.842                | 0.843                |
| Num. obs.                                                             | 72753                | 72753                | 72753                |
| RMSE                                                                  | 5.858                | 4.607                | 4.586                |

<sup>1</sup> \*\*\* $p < 0.01$ , \*\* $p < 0.05$ , \* $p < 0.10$ . Standard errors are given in parentheses. Model 2 controls for product-specific fixed effects, and Model 3 controls for year-week-specific fixed effects.

Table A12: Effect of Algorithmic Advice on Assortment Decisions: Area/Worker-level Heterogeneity

|                                                                       | (1)                  | (2)                  | (3)                  |
|-----------------------------------------------------------------------|----------------------|----------------------|----------------------|
| Net Num. Targeted                                                     | 0.340***<br>(0.010)  | 0.103***<br>(0.008)  | 0.109***<br>(0.008)  |
| Net Num. Targeted $\times$ Regret                                     | 0.004<br>(0.013)     | 0.001<br>(0.010)     | 0.001<br>(0.010)     |
| Net Num. Targeted $\times$ Delegation                                 | -0.046***<br>(0.007) | -0.012**<br>(0.006)  | -0.013**<br>(0.006)  |
| Net Num. Targeted $\times$ Experience                                 | 0.009<br>(0.013)     | 0.013<br>(0.010)     | 0.012<br>(0.010)     |
| Net Num. Targeted $\times$ Area Sales Volatility                      | -0.019***<br>(0.007) | 0.019***<br>(0.005)  | 0.018***<br>(0.005)  |
| Net Num. Targeted $\times$ Advice                                     | -0.001<br>(0.013)    | 0.023**<br>(0.010)   | 0.022**<br>(0.010)   |
| Net Num. Targeted $\times$ Advice $\times$ Regret                     | 0.022<br>(0.017)     | 0.026**<br>(0.013)   | 0.026**<br>(0.013)   |
| Net Num. Targeted $\times$ Advice $\times$ Delegation                 | -0.004<br>(0.010)    | -0.029***<br>(0.008) | -0.029***<br>(0.008) |
| Net Num. Targeted $\times$ Advice $\times$ Experience                 | -0.024<br>(0.018)    | -0.018<br>(0.014)    | -0.018<br>(0.014)    |
| Net Num. Targeted $\times$ Advice $\times$ Area Sales Volatility      | 0.010<br>(0.010)     | -0.019***<br>(0.008) | -0.019**<br>(0.008)  |
| Net Num. Targeted $\times$ Integration                                | -0.003<br>(0.013)    | -0.040***<br>(0.010) | -0.039***<br>(0.010) |
| Net Num. Targeted $\times$ Integration $\times$ Regret                | -0.050***<br>(0.014) | -0.063***<br>(0.011) | -0.063***<br>(0.011) |
| Net Num. Targeted $\times$ Integration $\times$ Delegation            | 0.019**<br>(0.009)   | 0.054***<br>(0.007)  | 0.053***<br>(0.007)  |
| Net Num. Targeted $\times$ Integration $\times$ Experience            | 0.021<br>(0.017)     | 0.048***<br>(0.013)  | 0.047***<br>(0.013)  |
| Net Num. Targeted $\times$ Integration $\times$ Area Sales Volatility | 0.032***<br>(0.009)  | 0.056***<br>(0.007)  | 0.055***<br>(0.007)  |
| Num. Centralized                                                      | 1.093***<br>(0.003)  | 0.831***<br>(0.004)  | 0.837***<br>(0.004)  |
| R <sup>2</sup>                                                        | 0.745                | 0.843                | 0.844                |
| Adj. R <sup>2</sup>                                                   | 0.745                | 0.842                | 0.844                |
| Num. obs.                                                             | 72753                | 72753                | 72753                |
| RMSE                                                                  | 5.854                | 4.604                | 4.584                |

<sup>1</sup> \*\*\* $p < 0.01$ , \*\* $p < 0.05$ , \* $p < 0.10$ . Standard errors are given in parentheses. Model 2 controls for product-specific fixed effects, and Model 3 controls for year-week-specific fixed effects.

Table A13: Effect of Algorithmic Advice on the Assortment Decisions: Area/Worker- and Machine-level Heterogeneity

|                                                                 | (1)                  | (2)                  | (3)                  |
|-----------------------------------------------------------------|----------------------|----------------------|----------------------|
| Net Num. Targeted                                               | 0.157***<br>(0.006)  | 0.020***<br>(0.006)  | 0.023***<br>(0.006)  |
| Net Num. Targeted × Regret                                      | 0.002<br>(0.007)     | -0.002<br>(0.006)    | -0.002<br>(0.006)    |
| Net Num. Targeted × Delegation                                  | -0.037***<br>(0.004) | -0.018***<br>(0.003) | -0.018***<br>(0.003) |
| Net Num. Targeted × Experience                                  | 0.031***<br>(0.007)  | 0.045***<br>(0.006)  | 0.045***<br>(0.006)  |
| Net Num. Targeted × Area Sales Volatility                       | -0.019***<br>(0.004) | 0.010***<br>(0.003)  | 0.009***<br>(0.003)  |
| Net Num. Targeted × High Sales Volume Machine                   | 0.010<br>(0.007)     | -0.007<br>(0.007)    | -0.006<br>(0.007)    |
| Net Num. Targeted × High Sales Volatility Machine               | -0.033***<br>(0.007) | -0.033***<br>(0.006) | -0.033***<br>(0.006) |
| Net Num. Targeted × Advice                                      | 0.062***<br>(0.008)  | 0.080***<br>(0.008)  | 0.080***<br>(0.008)  |
| Net Num. Targeted × Advice × Regret                             | 0.013<br>(0.009)     | 0.019**<br>(0.008)   | 0.019**<br>(0.008)   |
| Net Num. Targeted × Advice × Delegation                         | 0.005<br>(0.005)     | -0.008*<br>(0.005)   | -0.008*<br>(0.005)   |
| Net Num. Targeted × Advice × Experience                         | -0.039***<br>(0.010) | -0.048***<br>(0.009) | -0.048***<br>(0.009) |
| Net Num. Targeted × Advice × Area Sales Volatility              | -0.017***<br>(0.005) | -0.032***<br>(0.005) | -0.032***<br>(0.005) |
| Net Num. Targeted × Advice × High Sales Volume Machine          | -0.093***<br>(0.011) | -0.083***<br>(0.010) | -0.083***<br>(0.010) |
| Net Num. Targeted × Advice × High Sales Volatility Machine      | 0.058***<br>(0.010)  | 0.044***<br>(0.010)  | 0.045***<br>(0.010)  |
| Net Num. Targeted × Integration                                 | -0.046***<br>(0.008) | -0.068***<br>(0.008) | -0.068***<br>(0.008) |
| Net Num. Targeted × Integration × Regret                        | -0.024***<br>(0.008) | -0.036***<br>(0.007) | -0.036***<br>(0.007) |
| Net Num. Targeted × Integration × Delegation                    | -0.011**<br>(0.005)  | 0.010**<br>(0.005)   | 0.010**<br>(0.005)   |
| Net Num. Targeted × Integration × Experience                    | 0.006<br>(0.009)     | 0.021**<br>(0.008)   | 0.021**<br>(0.008)   |
| Net Num. Targeted × Integration × Area Sales Volatility         | 0.025***<br>(0.005)  | 0.036***<br>(0.004)  | 0.036***<br>(0.004)  |
| Net Num. Targeted × Integration × High Sales Volume Machine     | 0.099***<br>(0.011)  | 0.082***<br>(0.010)  | 0.083***<br>(0.010)  |
| Net Num. Targeted × Integration × High Sales Volatility Machine | -0.037***<br>(0.010) | -0.019**<br>(0.009)  | -0.019**<br>(0.009)  |
| Num. Centralized                                                | 0.403***<br>(0.001)  | 0.243***<br>(0.002)  | 0.246***<br>(0.002)  |
| R <sup>2</sup>                                                  | 0.476                | 0.565                | 0.566                |
| Adj. R <sup>2</sup>                                             | 0.476                | 0.564                | 0.565                |
| Num. obs.                                                       | 145688               | 145688               | 145688               |
| RMSE                                                            | 4.589                | 4.184                | 4.179                |

<sup>1</sup> \*\*\*  $p < 0.01$ , \*\*  $p < 0.05$ , \*  $p < 0.10$ . Standard errors are given in parentheses. Standard errors are clustered at the area level. Model 2 controls for product-specific fixed effects, and Model 3 controls for year-week-specific fixed effects.

Table A14: Effect of Algorithmic Advice on Assortment Decisions: Area/Worker- and Machine-level Heterogeneity and Potential Office-level Information-Sharing

|                                                                 | (1)                  | (2)                  | (3)                  |
|-----------------------------------------------------------------|----------------------|----------------------|----------------------|
| Net Num. Targeted                                               | 0.087***<br>(0.007)  | 0.022***<br>(0.006)  | 0.024***<br>(0.006)  |
| Average Net Num. Targeted in the Office                         | 0.150***<br>(0.006)  | -0.006<br>(0.006)    | -0.003<br>(0.006)    |
| Net Num. Targeted × Regret                                      | -0.006<br>(0.007)    | -0.001<br>(0.006)    | -0.002<br>(0.006)    |
| Net Num. Targeted × Delegation                                  | -0.032***<br>(0.004) | -0.018***<br>(0.003) | -0.019***<br>(0.003) |
| Net Num. Targeted × Experience                                  | 0.040***<br>(0.007)  | 0.045***<br>(0.006)  | 0.045***<br>(0.006)  |
| Net Num. Targeted × Area Sales Volatility                       | -0.017***<br>(0.004) | 0.010***<br>(0.003)  | 0.009***<br>(0.003)  |
| Net Num. Targeted × High Sales Volume Machine                   | 0.008<br>(0.007)     | -0.007<br>(0.007)    | -0.006<br>(0.007)    |
| Net Num. Targeted × High Sales Volatility Machine               | -0.035***<br>(0.007) | -0.033***<br>(0.006) | -0.033***<br>(0.006) |
| Net Num. Targeted × Advice                                      | 0.186***<br>(0.010)  | 0.075***<br>(0.009)  | 0.077***<br>(0.009)  |
| Net Num. Targeted × Advice × Regret                             | 0.017*<br>(0.009)    | 0.019**<br>(0.008)   | 0.019**<br>(0.008)   |
| Net Num. Targeted × Advice × Delegation                         | -0.013**<br>(0.005)  | -0.007<br>(0.005)    | -0.007<br>(0.005)    |
| Net Num. Targeted × Advice × Experience                         | -0.046***<br>(0.010) | -0.048***<br>(0.009) | -0.048***<br>(0.009) |
| Net Num. Targeted × Advice × Area Sales Volatility              | -0.003<br>(0.005)    | -0.032***<br>(0.005) | -0.032***<br>(0.005) |
| Net Num. Targeted × Advice × High Sales Volume Machine          | -0.089***<br>(0.011) | -0.083***<br>(0.010) | -0.083***<br>(0.010) |
| Net Num. Targeted × Advice × High Sales Volatility Machine      | 0.060***<br>(0.010)  | 0.044***<br>(0.010)  | 0.045***<br>(0.010)  |
| Net Num. Targeted × Integration                                 | -0.045***<br>(0.008) | -0.069***<br>(0.008) | -0.068***<br>(0.008) |
| Net Num. Targeted × Integration × Regret                        | -0.031***<br>(0.008) | -0.036***<br>(0.007) | -0.036***<br>(0.007) |
| Net Num. Targeted × Integration × Delegation                    | 0.010*<br>(0.005)    | 0.009**<br>(0.005)   | 0.010**<br>(0.005)   |
| Net Num. Targeted × Integration × Experience                    | -0.002<br>(0.009)    | 0.022***<br>(0.008)  | 0.021**<br>(0.008)   |
| Net Num. Targeted × Integration × Area Sales Volatility         | 0.025***<br>(0.005)  | 0.036***<br>(0.004)  | 0.036***<br>(0.004)  |
| Net Num. Targeted × Integration × High Sales Volume Machine     | 0.099***<br>(0.011)  | 0.082***<br>(0.010)  | 0.083***<br>(0.010)  |
| Net Num. Targeted × Integration × High Sales Volatility Machine | -0.040***<br>(0.010) | -0.019**<br>(0.009)  | -0.019**<br>(0.009)  |
| Num. Centralized                                                | 0.400***<br>(0.001)  | 0.243***<br>(0.002)  | 0.246***<br>(0.002)  |
| R <sup>2</sup>                                                  | 0.478                | 0.565                | 0.566                |
| Adj. R <sup>2</sup>                                             | 0.478                | 0.564                | 0.565                |
| Num. obs.                                                       | 145688               | 145688               | 145688               |
| RMSE                                                            | 4.580                | 4.184                | 4.179                |

<sup>1</sup> \*\*\*  $p < 0.01$ , \*\*  $p < 0.05$ , \*  $p < 0.10$ . Standard errors are given in parentheses. Standard errors are clustered at the area level. Model 2 controls for product-specific fixed effects, and Model 3 controls for year-week-specific fixed effects.

Table A15: Do You Trust This Product Assortment Algorithm?

| (%)               | <i>All</i>    |              | <i>Control</i> |              | <i>Treatment I</i> |              | <i>Treatment II</i> |              |
|-------------------|---------------|--------------|----------------|--------------|--------------------|--------------|---------------------|--------------|
|                   | <i>Before</i> | <i>After</i> | <i>Before</i>  | <i>After</i> | <i>Before</i>      | <i>After</i> | <i>Before</i>       | <i>After</i> |
| Strongly agree    | 0.034         | 0.039        | 0.033          | 0.033        | 0.017              | 0.050        | 0.051               | 0.034        |
| Agree             | 0.324         | 0.408        | 0.400          | 0.533        | 0.317              | 0.333        | 0.254               | 0.356        |
| Disagree          | 0.363         | 0.330        | 0.333          | 0.317        | 0.383              | 0.367        | 0.373               | 0.305        |
| Strongly Disagree | 0.201         | 0.134        | 0.183          | 0.050        | 0.183              | 0.133        | 0.237               | 0.220        |
| No Answer         | 0.078         | 0.089        | 0.050          | 0.067        | 0.100              | 0.117        | 0.085               | 0.085        |
| N                 | 179           | 179          | 60             | 60           | 60                 | 60           | 59                  | 59           |

<sup>1</sup> The unit of observations is an area.

Table A16: Do You Trust This Product Assortment Algorithm?: Ordered Probit

|                          | <i>All</i> | <i>Control</i> | <i>Treatment I</i> | <i>Treatment II</i> | <i>All</i> |
|--------------------------|------------|----------------|--------------------|---------------------|------------|
| After                    | 0.42**     | 0.70*          | 0.33               | 0.23                | 0.42**     |
|                          | (0.21)     | (0.36)         | (0.36)             | (0.35)              | (0.21)     |
| Experience $\geq$ 1 year |            |                |                    |                     | -0.94      |
|                          |            |                |                    |                     | (0.72)     |
| AIC                      | 773.23     | 251.01         | 255.78             | 271.71              | 773.45     |
| BIC                      | 788.40     | 261.92         | 266.48             | 282.44              | 792.41     |
| Log Likelihood           | -382.62    | -121.50        | -123.89            | -131.85             | -381.72    |
| Deviance                 | 765.23     | 243.01         | 247.78             | 263.71              | 763.45     |
| Num. obs.                | 328        | 113            | 107                | 108                 | 328        |

<sup>1</sup> \*\*\* $p < 0.01$ , \*\* $p < 0.05$ , \* $p < 0.10$ . Standard errors are given in parentheses.
